# Supplementary material for: Examination of gametocyte protein 22 localization and oocyst wall formation in Eimeria necatrix using laser confocal microscopy and scanning electron microscopy
Source: Research Square preprint supplement (doi:10.21203/rs.3.rs-2455251/v1), 2023-01-11
Supplement: Supplementary file 1 [file be17f02b7579a4f6f0fa5ee3.docx]

**Table S1** ELISA Results of Polyclonal Antibody

| Type of antibody | OD450(mean) | SD(±) |
| --- | --- | --- |
| Mouse anti-EnGAM59 | 3.06 | 0.02 |
| Mouse negative serum | 0.10 | 0.01 |
| Mouse anti-WFBs | 3.13 | 0.05 |
| Mouse negative serum | 0.13 | 0.01 |
| Rabbit anti-EnGAM22 | 2.86 | 0.10 |
| Rabbit negative serum | 0.17 | 0.01 |
| Rabbit anti-EnGAM59 | 2.55 | 0.14 |
| Rabbit negative serum | 0.16 | 0.03 |

OD: optical density;

SD: standard deviation.
